# Supplementary material for: College Health Surveillance Network: Epidemiology and Health Care Utilization of College Students at US 4-Year Universities
Source: PubMed Central journal article supplement — J Am Coll Health. 2015 Nov 16;63(8):530–8. doi: 10.1080/07448481.2015.1055567 (PMC4673518; doi:10.1080/07448481.2015.1055567), 2015-11-16
Supplement: vach_a_1055567_sm2626.pdf [file vach_a_1055567_sm2626.pdf]

**ONLINE APPENDICES FOR**

**College Health Surveillance Network: Epidemiology and  
Health Care Utilization of College Students at US 4-Year  
Universities**

James C. Turner, MD<sup>1,2</sup>; Adrienne Keller, PhD<sup>1,2</sup>

<sup>1</sup>National Social Norms Institute, University of Virginia, Charlottesville, Virginia

<sup>2</sup>Department of Student Health, University of Virginia, Charlottesville, Virginia

**Appendix A**  
**Categories of CPT Procedural Codes within the**  
**College Health Surveillance Network (CHSN)**

**Codes Defining a Primary Care Visit: All 99xxx codes from 99201. The most frequently occurring are:**

- 99201 thru 99205: New patient with complaint
- 99211 thru 99215: Established patient with complaint
- 99218 thru 99239: Inpatient management
- 99241 thru 99245, 99450: New/Established patient consult
- 99358 thru 99360, 99371 thru 99373, 99441 thru 99444: telephone or online contact with a physician
- 99381 thru 99387: New patient, preventive visit
- 99391 thru 99397: Established patient, preventive visit
- 99401 thru 99429: Risk reduction
- 99499, 99999 Unlisted evaluation & management service

**Codes Defining a Behavioral/Mental Health Visit**

- 90791 & 90792
- 90801 thru 90899
- 96101 thru 96125

**Codes Defining a Vaccine-related Visit**

- 90281 thru 90749
- Q2037

**Codes in the “Miscellaneous Other” Category**

- 10021 thru 69990: Surgery
- 70010 thru 79999: Radiology
- 80047 thru 89398: Pathology/Laboratory
- 92002 thru 92499: Ophthalmology
- 95000 thru 95075: Allergy test
- 95115 thru 95119: Allergy prophylactic
- 97001 thru 97546, 98926: Physical therapy/Rehabilitation
- 97802 thru 97804: Nutrition
- 98966 thru 98969: Telephone or online contact with a non-physician
- 90782, 90901, 90911, 91065, 93000 thru 94799, 95800 thru 96999, 97597 thru 97799, 97810, 97811, 98960 thru 98962: Other medical

**Appendix B**  
**ICD-9 Diagnostic Code Groups and Categories within the**  
**College Health Surveillance Network (CHSN)**

**ABDOMINAL/DIGESTIVE/GASTRO CATEGORY**

**Abdominal pain**

- Abdominal pain - 789
- Abdominal pain epigastric - 789.06
- Abdominal pain unspecified site - 789.00
- Abdominal pain, generalized – 789.07
- Abdominal pain, other specified site - 789.09
- Abdominal pain, right lower quadrant - 789.03
- Hernia, diaphragmatic - 553.3

**Anal fissure or fistula**

- Anal fissure - 565.0
- Anal fissure and fistula - 565
- Anal fistula - 565.1

**Digestive disorders, functional**

- Constipation - 564.0
- Constipation - 564.00
- Constipation, other - 564.09
- Constipation, outlet dysfunction - 564.02
- Constipation, slow transit - 564.01
- Constipation, unspecified - 564.00
- Digestive disorders, functional; not elsewhere classified - 564
- Irritable Bowel Syndrome (IBS) - 564.1

**Digestive system symptoms**

- Bowel sounds, abnormal - 787.5
- Diarrhea - 787.91
- Digestive system symptoms - 787
- Digestive system symptoms, other - 787.9
- Digestive system symptoms, other (change in bowel habits, tenesmus (rectal) - 787.99
- Dysphagia - 787.2
- Dysphagia, oral phase - 787.21
- Dysphagia, oropharyngeal phase - 787.22
- Dysphagia, other - 787.29
- Dysphagia, pharyngeal phase - 787.23
- Dysphagia, pharyngoesophageal phase - 787.24
- Dysphagia, unspecified (difficulty in swallowing NOS) - 787.20
- Feces, abnormal - 787.7
- Flatulence, cructation and gas pain - 787.3
- Heartburn - 787.1
- Incontinence of feces excludes that of non-organic origin - 787.6
- Nausea alone - 787.02
- Nausea and vomiting - 787.0
- Nausea with vomiting - 787.01
- Peristalsis, visible - 787.4
- Vomiting alone - 787.03

**Esophagitis**

- Esophageal reflux, (gastroesophageal reflux) - 530.81
- Esophagitis - 530.1
- Esophagitis - 530.10

**Gastritis and duodenitis**

- Duodenitis - 535.6
- Gastritis and duodenitis - 535
- Gastritis and duodenitis, unspecified - 535.5
- Gastritis and gastroduodenitis, unspecified - 535.50
- Gastritis, acute - 535.0
- Gastritis, atrophic - 535.1
- Gastritis, eosinophilic - 535.7
- Gastritis, other specified - 535.4

**Gastroenteritis**

- Gastroenteritis, acute viral – 008.8
- Intestinal infection due to other organism, not elsewhere classified - 008.8, 8.8
- Norovirus - 008.63
- Other and unspecified noninfectious gastroenteritis and colitis - 558
- Other and unspecified noninfectious gastroenteritis and colitis - 558.9

**Gastrointestinal hemorrhage**

- Blood in stool - 578.1
- Gastrointestinal hemorrhage - 578
- Hematemesis (vomiting blood) - 578.0
- Hemorrhage of gastrointestinal tract, unspecified - 578.9
- hemorrhage of rectum and anus - 569.3

**Hemorrhoids**

- Hemorrhoidal skin tags, residual - 455.9
- Hemorrhoids - 455
- Hemorrhoids, external thrombosed - 455.4
- Hemorrhoids, external, with other complication - 455.5
- Hemorrhoids, external, without mention of complication - 455.3
- Hemorrhoids, internal, with other complication - 455.2
- Hemorrhoids, internal, without mention of complication - 455.0
- Hemorrhoids, unspecified thrombosed - 455.7
- Hemorrhoids, unspecified, with other complication - 455.8
- Hemorrhoids, unspecified, without mention of complication - 455.6
- Hemorrhoids,internal thrombosed - 455.1

**Inguinal hernia**

- Inguinal hernia - 550
- Inguinal hernia, with gangrene - 550.0
- Inguinal hernia, with obstruction without mention of gangrene - 550.1
- Inguinal hernia, without mention of obstruction or gangrene - 550.90

**Inflammatory bowel disease**

- Crohns disease NOS - 555.9
- Crohns disease, large intestine - 555.1
- Crohns disease, small and large intestine - 555.2
- Crohns disease, small intestine - 555.0
- Ulcerative colitis - 556.
- Ulcerative colitis unspecified - 556.9
- Ulcerative colitis, enterocolitis chronic - 556.0
- Ulcerative colitis, ileocolitis chronic - 556.1
- Ulcerative colitis, left sided chronic - 556.5
- Ulcerative colitis, other - 556.8
- Ulcerative colitis, proctitis chronic - 556.2
- Ulcerative colitis, proctosigmoiditis chronic - 556.3
- Ulcerative colitis, pseudopolyposis of colon - 556.4
- Ulcerative colitis, universal chronic - 556.6

## **ALLERGIES CATEGORY**

### **Allergies**

- Allergic rhinitis due to animal (cat) (dog) hair and dander - 477.2
- Allergic rhinitis due to other allergen - 477.8
- Allergic rhinitis due to pollen - 477.0
- Allergic rhinitis/hay fever - 477.9
- Allergy - V15.09
- Allergy Unspecified - 995.3

### **Anaphylaxis**

- Anaphylaxis due to allergy immunization - 999.4
- Anaphylaxis due to food - 995.6
- Anaphylaxis due to sting or venom - 989.5
- Anaphylaxis, NOS late effect - 909.9
- Anaphylaxis, NOS or allergic - 995.0

### **Urticaria**

- Urticaria - 708
- Urticaria due to cold and heat - 708.2
- Urticaria, allergic - 708.0
- Urticaria, cholinergic - 708.5
- Urticaria, dermatographic - 708.3
- Urticaria, other specified - 708.8
- Urticaria, unspecified - 708.9
- Urticaria, vibratory - 708.4

## **CIRCULATORY & LYMPH CATEGORY**

### **Blood disorders**

- Anemia, unspecified - 285.9
- Epistaxis - 784.7
- Iron deficiency anemia, unspecified – 280.9

### **Cardiovascular**

- Benign essential hypertension - 401.1
- Dizziness - 780.4
- Episode Of elevated BP - 796.2
- Hypertension, unspecified - 401.9
- Palpitations - 785.1
- Syncope (vasovagal) - 780.2

### **Lymphadenopathy**

- Enlarged lymph nodes - 785.6

### **Pulmonary embolism**

- Deep vein thrombosis (DVT) acute - 453.4
- Deep vein thrombosis (DVT) NOS - 453
- Pulmonary embolism, postoperative or iatrogenic - 415.11
- Pulmonary embolism, septic - 415.12

## **DEVELOPMENTAL/CONGENITAL CATEGORY**

- Congenital anomalies, (other anomalies of larynx, trachea and bronchus) - 748.3
- Congenital hypertrophic pyloric stenosis - 750.5
- Other specific developmental learning difficulties - 315.2
- Other specified developmental delay - 315.8
- Other specified pervasive developmental disorders - 299.8
- Other specified pervasive developmental disorders current or active state - 299.80
- Specific delays in development - 315

## **EYE, EAR & MOUTH CATEGORY**

### **Ear disorders**

- Cerumen impacted - 380.4
- Eustachian tube dysfunction - 381.81
- Nonsuppurative otitis media NOS - 381.4
- Otagia -388.7
- Otagia, unspecified - 388.70
- Otitis externa - 380.10
- Otitis media - 382.9

### **Effects of air pressure**

- Effects of air pressure - 993
- Effects of air pressure - barotrauma, otitic - 993.0
- Effects of air pressure - barotrauma, sinus - 993.1
- Effects of air pressure - Caisson disease - 993.3
- Effects of air pressure caused by explosion - 993.4
- Effects of air pressure, other specified - 993.8
- Effects of air pressure, unspecified - 993.9

### **Mouth & dentition**

- Dental caries limited to enamel - 521.01
- Dental exam - V72.2
- Oral aphthae - 528.2
- Other and unspecified diseases of the oral soft tissues - 528.9
- Unspecified disorder of the teeth and supporting structures - 525.9

### **Eye & Vision disorders**

- Astigmatism, unspecified - 367.20
- Blepharitis, unspecified - 373.00
- Disorder of eye, unspecified – 379.9
- Dry eye syndrome – 375.15
- Myopia - 367.1
- Pain in or around eye – 379.91
- Redness or discharge of eye – 379.93
- Regular astigmatism - 367.21

## **FEMALE REPRODUCTIVE SYSTEM CATEGORY**

### **Female Genito-urinary NOS**

- Breast, lump or mass in - 611.72
- Breast, other - 611.79
- Breast, signs and symptoms in - 611.7
- Diffuse cystic mastopathy - 610.1
- Dyspareunia - 625.0
- Galactorrhea not associated with childbirth - 611.6
- Mastodynia (pain in breast) - 611.71
- Other inflammatory disease of cervix, vagina and vulva - 616.89
- Other specified noninflammatory disorders of vagina - 623.8

### **Menstruation & other female genital tract disorders**

- Amenorrhea - 626.0
- Bleeding, ovulation - 626.5
- Bleeding, postcoital - 626.7
- Bleeding, puberty - 626.3
- Dysmenorrhea - 625.3
- Menstrual cycle, irregular - 626.4
- Menstruation disorders and other abnormal bleeding from female genital tract - 626
- Menstruation disorders and other abnormal bleeding from female genital tract, other - 626.8

- Menstruation disorders and other abnormal bleeding from female genital tract, unspecified - 626.9
- Menstruation, absence of (amenorrhea) - 626.0
- Menstruation, extensive or frequent - 626.2
- Menstruation, scanty or infrequent - 626.1
- Metrorrhagia - 626.6
- NonInflammatory disease of vulva NOS - 624.9
- Polycystic ovaries - 256.4
- Unspecified symptoms of female genital organs - 625.9

**Pregnancy observation/supervision**

- Pregnancy, normal - V22
- Pregnancy, supervision of normal first - V22.0
- Pregnancy, supervision of other normal - V22.1
- Pregnant state, incidental - V22.2

**Vaginitis & vulvovaginitis**

- Vaginal discharge NOS - 623.5
- Vaginitis and vulvovaginitis - 616.1
- Vaginitis and vulvovaginitis in diseases classified elsewhere - 616.11
- Vaginitis and vulvovaginitis, unspecified - 616.10
- Vulva, other abscess of - 616.4

**INFECTIOUS NON-STI CATEGORY**

**Bacterial infection not grouped elsewhere**

- Bacterial infection in conditions classified elsewhere and of unspecified site - 041
- Impetigo - 684
- Staphylococcus - 041.1
- Staphylococcus aureus, methicillin resistant (MRSA) - 041.12
- Staphylococcus aureus, methicillin susceptible - 041.11
- Staphylococcus, Other - 041.19
- Staphylococcus, unspecified - 041.10

**Carbuncle and furuncle**

- Carbuncle and furuncle - 680
- Carbuncle and furuncle unspecified site - 680.9
- Carbuncle and furuncle, buttock - 680.5
- Carbuncle and furuncle, face - 680.0
- Carbuncle and furuncle, hand - 680.4
- Carbuncle and furuncle, leg, except foot - 680.6
- Carbuncle and furuncle, neck - 680.1
- Carbuncle and furuncle, other specified sites (excludes genital organs) - 680.8
- Carbuncle and furuncle, trunk - 680.2
- Carbuncle and furuncle, upper arm and forearm - 680.3

**Chickenpox**

- Chicken pox postvaricella encephalitis - 052.0
- Chickenpox - 052
- Chickenpox postvaricella myelitis - 052.2
- Chickenpox varicella (hemorrhagic) pneumonitis - 052.1
- Chickenpox w/ other specified complications - 052.7
- Chickenpox w/ unspecified complication - 052.8
- Chickenpox w/out mention of complication; varicella NOS - 052.9
- Varicella without mention of complication - 052.9

**Conjunctivitis**

- Acute conjunctivitis NOS - 372.00
- Chalazion - 373.2
- Conjunctivitis, chronic - 372.1

- Conjunctivitis, other chronic allergic - 372.14
- Conjunctivitis, other unspecified - 372.3
- Conjunctivitis, parasitic - 372.15
- Conjunctivitis, unspecified - 372.30
- Conjunctivitis, unspecified chronic - 372.10
- Conjunctivitis, vernal - 372.13
- Viral conjunctivitis NOS - 77.99

**Hepatitis B**

- Hepatitis B - 070.2
- Hepatitis B antigen positive - 070.3
- Hepatitis B carrier - V02.61
- Hepatitis B chronic - 070.22
- Hepatitis B chronic with delta - 070.23
- Hepatitis B, acute or unspecified - 070.20
- Hepatitis B, acute or unspecified with delta - 070.21

**Herpes zoster**

- Herpes zoster (shingles) - 053
- Herpes zoster dermatitis of eyelid - 053.20
- Herpes zoster geniculate - 053.11
- Herpes zoster iridocyclitis - 053.22
- Herpes zoster keratoconjunctivitis - 053.21
- Herpes zoster myelitis - 053.14
- Herpes zoster other nervous system complication - 053.19
- Herpes zoster postherpetic polyneuropathy - 053.13
- Herpes zoster postherpetic trigeminal neuralgia - 053.12
- Herpes zoster w/ ophthalmic complications, other - 053.29
- Herpes zoster w/ ophthalmic complications - 053.2
- Herpes zoster w/ other nervous system complications - 053.1
- Herpes zoster w/ other specified complications - 053.7
- Herpes zoster w/ otitis externa - 053.71
- Herpes zoster w/ unspecified complication - 053.8
- Herpes zoster w/out mention of complication, NOS - 053.9
- Herpes zoster with other complications - 053.79
- Herpes zoster with unspecified nervous system complications - 053.10
- Herpes zoster without mention of complication - 53.9
- Herpes zoster, with meningitis - 053.0

**Influenza**

- Influenza - 487
- Influenza with other manifestations - 487.8
- Influenza with other respiratory manifestations - 487.1
- Influenza with pneumonia - 487.0

**Measles**

- Measles - 055
- Measles encephalitis - 055.0
- Measles otitis media - 055.2
- Measles pneumonia - 055.1

**Meningococcal infection**

- Meningococcal arthropathy - 036.82
- Meningococcal carditis - 036.4
- Meningococcal carditis, unspecified - 036.40
- Meningococcal encephalitis - 036.1
- Meningococcal endocarditis - 036.42
- Meningococcal infection - 036



- Meningococcal infection, Other - 036.89
- Meningococcal infection, unspecified - 036.9
- Meningococcal infections, other specified - 036.8
- Meningococcal meningitis - 036.0
- Meningococcal myocarditis - 036.43
- Meningococcal optic neuritis - 036.81
- Meningococcal pericarditis - 036.41
- Waterhouse-Friderichsen syndrome, meningococcal - 036.3

**Mononucleosis**

- Mononucleosis, infectious - 75
- Mononucleosis, infectious - 075

**Mumps**

- Abscess of salivary gland - 527.3
- Mumps – 072, 72
- Mumps meningitis - 072.1, 72.1
- Mumps, without mention of complication - 072.9, 72.9
- Parotitis – 072.9

**Pertussis**

- Pertussis - 033
- Pertussis due to *B. pertussis* - 033.0
- Pertussis due to other organism - 033.8
- Pertussis due to parapertussis - 033.1
- Pertussis due to unspecified organism - 033.9

**Rubella**

- Rubella - 056
- Rubella without complications - 056.9
- Rubella with neurological complications - 056.0
- Rubella encephalomyelitis - 056.01

**Strep sore throat & scarlet fever**

- Scarlet fever - 034.1
- Streptococcal sore throat - 034.0
- Streptococcal sore throat and scarlet fever – 034, 23

**Tuberculosis**

- Nonspecific reaction to tuberculin skin test, not active tuberculosis - 795.51
- PPD, positive (nonspecific reaction to tuberculin skin test without active tuberculosis) - 795.5
- Quantiferon Gold positive blood test - 795.52
- Tuberculosis, pleurisy - 010.1
- Tuberculosis, primary infection - 010
- Tuberculosis, primary infection progressive - 010.8
- Tuberculosis, primary TB complex - 010.00
- Tuberculosis, primary unspecified - 010.9
- Tuberculosis, pulmonary - 011
- Tuberculosis, pulmonary cavities - 011.2
- Tuberculosis, pulmonary infiltrate - 011.0

**Viral infections not grouped elsewhere**

- Herpes simplex, oral - 054.9, 54.9
- Other diseases due to viruses & Chlamydiae - 78
- Viral infection NOS - 079.99, 79.99
- Viral warts unspecified - 078.10

**INJURIES CATEGORY**

**Concussion**

- Concussion - 850

- Concussion with brief loss of consciousness - 850.1
- Concussion with brief loss of consciousness, 30 min or less - 850.11
- Concussion with brief loss of consciousness, 31 to 59 min - 850.12
- Concussion with loss of consciousness of unspecified duration - 850.5
- Concussion with moderate loss of consciousness, 1-24 hours - 850.2
- Concussion with no loss of consciousness - 850.0
- Concussion with prolonged loss of consciousness and return to pre-existing conscious level (more than 24 hours with complete recovery) - 850.3
- Concussion with prolonged loss of consciousness, without return to pre-existing conscious level - 850.4
- Concussion, unspecified - 850.9

**Contusion of eye & adnexa**

- Contusion of eye and adnexa - 921
- Contusion of eye and adnexa- black eye, NOS - 921.0
- Contusion of eye and adnexa- eye, Unspecified, (injury of eye NOS) - 921.9
- Contusion of eye and adnexa- eyeball - 921.3
- Contusion of eye and adnexa- eyelids and periocular area - 921.1
- Contusion of eye and adnexa- orbital tissues - 921.2

**Contusion trunk**

- Contusion, abdominal wall - 922.2
- Contusion, back - 922.3
- Contusion, back excluding the interscapular region - 922.31
- Contusion, breast - 922.0
- Contusion, buttock - 922.32
- Contusion, chest wall - 922.1
- Contusion, genital organs - 922.4
- Contusion, interscapular region - 922.33
- Contusion, multiple sites of trunk - 922.8
- Contusion, trunk - 922
- Contusion, unspecified part of the trunk (trunk NOS) - 922.9

**Eye & adnexa superficial injury**

- Corneal injury due to contact lens - 371.82
- Superficial injury of eye and adnexa - 918
- Superficial injury of eye and adnexa, eyelid and periocular area; abrasion, insect bite, or superficial foreign body (splinter) - 918.0
- Superficial injury of eye and adnexa: conjunctiva - 918.2
- Superficial injury of eye and adnexa: corneal abrasion - 918.1
- Superficial injury of eye and adnexa: eye, other unspecified superficial injury - 918.9

**Fracture**

- Fracture base of skull - 801
- Fracture humerus - 812
- Fracture of ankle - 824
- Fracture of carpal bones - 814
- Fracture of clavicle - 810
- Fracture of face bones - 802
- Fracture of lower limb, other, multiple & ill-defined - 827
- Fracture of metacarpal bone(s) - 815
- Fracture of neck of femur - 820
- Fracture of one or more phalanges of foot - 826
- Fracture of one or more phalanges of hand - 816
- Fracture of one or more tarsal & metatarsal bones - 825
- Fracture of other & unspecified parts of femur - 821
- Fracture of patella - 822
- Fracture of pelvis - 808

- Fracture of radius and ulna - 813
- Fracture of rib(s) sternum larynx and trachea - 807
- Fracture of scapula - 811
- Fracture of tibia and fibula - 823
- Fracture of unspecified bones - 829
- Fracture of vault of skull - 800
- Fracture of vertebral column with spinal cord injury - 806
- Fracture of vertebral column without a mention of spinal cord injury - 805
- Fracture, skull, other and unqualified - 803
- Fracture, unspecified bones, closed - 829.0
- Fracture, unspecified bones, open - 829.1
- Fractures involving both lower limbs, lower with upper limb, & lower limb(s) with rib(s) & sternum, multiple - 828
- Fractures involving both upper limbs, and upper limb with rib(s) and sternum, multiple - 819
- Fractures of bones of trunk, ill-defined - 809
- Fractures of hand bones, multiple - 817
- Fractures of upper limb, ill-defined - 818
- Fractures, multiple, involving skull or face with other bones - 804

**Lower limb, non-fracture**

- Ankle sprains & strains - 845
- Contusion of lower limb and of other and unspecified sites - 924
- Contusion of the hip - 924.01
- Contusion of the thigh - 924.00
- Contusion, ankle and foot, excluding toe(s) - 924.2
- Contusion, knee - 924.11
- Contusion, lower leg - 924.10
- Contusion, multiple sites of lower limb - 924.4
- Contusion, multiple sites, not else were classified - 924.8
- Contusion, toe - 924.3
- Contusion, unspecified part of lower limb - 924.5
- Contusion, unspecified site - 924.9
- Contusions of hip and thigh - 924.0
- Contusions, knee and lower leg - 924.1
- Cruciate ligament of knee - 844.2
- Dislocation of patella, closed - 836.3
- Injury to ankle - 959.7
- Other sprains and strains of ankle - 845.09
- Sprain of foot, unspecified site - 845.10
- Sprains and strains of other specified sites of knee and leg - 844.8
- Sprains and strains of unspecified site of hip and thigh - 843.9
- Unspecified ankle sprain - 845.00
- Unspecified site of knee and leg - 844.9

**Other injury**

- Contusion of face, scalp & neck except eye(s) - 920
- Head injury, unspecified – 959.01
- Injury of face and neck - 959.09
- Neck injury - 847.0
- Sprain of unspecified site of back - 847.9
- Superficial : abrasion or friction burn, infected - 919.1
- Superficial injury of other, multiple & unspecified sites - 919
- Superficial injury without mention of infection, other - 919.8
- Superficial injury: abrasion or friction burn without mention of infection - 919.0
- Superficial injury: blister without mention of infection - 919.2

- Superficial injury: blister, infected - 919.3
- Superficial injury: foreign body (splinter), superficial, without major open wound and without mention of infection - 919.6
- Superficial injury: foreign body, superficial, without major open wound, infected (splinter) - 919.7
- Superficial injury: insect bite, nonvenomous, infected - 919.5
- Superficial injury: insect Bite, nonvenomous, without mention of infection (NOS) - 919.4
- Superficial injury: unspecified, infected, other - 919.9

**Upper limb, non-fracture**

- Contusion, axillary region - 923.02
- Contusion, elbow - 923.11
- Contusion, elbow and forearm - 923.1
- Contusion, finger - 923.3
- Contusion, forearm - 923.10
- Contusion, hand(s) - 923.20
- Contusion, multiple sites of upper limb - 923.8
- Contusion, multiple upper limb sites - 923.09
- Contusion, scapular region - 923.01
- Contusion, shoulder and upper arm - 923.0
- Contusion, shoulder region - 923.00
- Contusion, unspecified part of the upper limb - 923.9
- Contusion, upper arm - 923.03
- Contusion, upper limb - 923
- Contusion, wrist - 923.21
- Contusion, wrist and hand(s) except finger(s) alone - 923.2
- Elbow, forearm and wrist injury - 959.3
- Finger injury, unspecified - 959.5
- Hand, except finger injury - 959.4
- Open wound of finger(s), without mention of complication - 883.0
- Other joint derangement, not elsewhere classified, shoulder region - 718.81
- Shoulder and upper arm injury - 959.2
- Sprain shoulder arm NEC - 840.8
- Sprains and strains of unspecified site of shoulder and upper arm - 840.9
- Sprains and strains of wrist and hand - 842.00
- Superior glenoid labrum lesion - 840.7

**Wound dressing & suture procedures**

- Dressings and sutures, attention to - V58.3
- Laceration - 879.8
- Nonsurgical wound dressing, encounter for change or removal of - V58.30
- Surgical wound dressings, encounter for the change or removal of - V58.31
- Suture removal - V58.32

**MALE REPRODUCTIVE SYSTEM CATEGORY**

**Azoospermia**

- Azoospermia - 606.0
- Oligospermia - 606.1

**Penile inflammatory disorders**

- Male external genital organs, other inflammatory disorders - 608.4
- Male genital organs, unspecified disorder - 608.9
- Penis, other inflammatory disorders - 607.2

**MENTAL HEALTH CATEGORY**

**Abuse of drugs**

- Abuse cannabis, continuous - 305.21

- Abuse cannabis, episodic - 305.22
- Abuse cannabis, in remission - 305.23
- Abuse of drugs, nondependent - 305
- Abuse, amphetamine or related acting sympathomimetic abuse - 305.7
- Abuse, antidepressant type - 305.8
- Abuse, cannabis - 305.2
- Abuse, cannabis unspecified - 305.20
- Abuse, cocaine - 305.6
- Abuse, hallucinogen - 305.3
- Abuse, opioid - 305.5
- Abuse, sedative, hypnotic or anxiolytic - 305.4
- Abuse, sedative, hypnotic or anxiolytic continuous - 305.41
- Abuse, sedative, hypnotic or anxiolytic episodic - 305.42
- Abuse, sedative, hypnotic or anxiolytic unspecified - 305.40
- Cannabis dependence - 304.3
- Cannabis dependence unspecified use - 304.30
- Combinations of drug dependence excluding opioid type drug - 304.8
- Combinations of drug dependence excluding opioid type drug unspecified use - 304.80
- Drug induced mental disorder - 292.89
- Long term current drug use - V58.69
- Nondependent other mixed or unspecified drug abuse - 305.9
- Opioid type dependence unspecified use - 304.00
- Other mixed or unspecified drug abuse unspecified use - 305.90
- Substance abuse counseling - V65.42
- Tobacco use disorder - 305.1
- Tobacco use disorder - 305.10

**ADHD & ADD**

- ADHD predominantly hyperactive-compulsive - 314.01
- ADHD, predominantly inattentive type - 314.00
- Attention Deficit/Hyperactivity Disorder NOS - 314.9
- Hyperkinesis of childhood with developmental delay - 314.1
- Hyperkinetic syndrome of childhood – 314
- Hyperkinetic syndrome of childhood - 314.89
- Impulse control disorder - 312.39
- Impulse control disorder unspecified - 312.30

**Adjustment reaction disorders**

- Adjustment depressive reaction, prolonged - 309.1
- Adjustment disorder with anxiety - 309.24
- Adjustment disorder with depressed mood - 309.0
- Adjustment disorder with disturbance of conduct - 309.3
- Adjustment disorder with mixed anxiety and depressed mood - 309.28
- Adjustment disorder with mixed disturbance of emotions and conduct - 309.4
- Adjustment disorder, emancipation disorder of adolescence and early adult life - 309.22
- Adjustment disorder, separation anxiety disorder - 309.21
- Adjustment disorder, specific academic or work inhibition - 309.23
- Adjustment reaction - 309
- Adjustment reaction - 309.27
- Adjustment reaction with physical symptoms - 309.82
- Adjustment reaction with predominant disturbance of other emotions - 309.2
- Adjustment reaction with predominant disturbance of other emotions (culture shock), Other - 309.29
- Adjustment reaction with withdrawal - 309.83
- Adjustment reactions, other - 309.89
- Adjustment reactions,,other specified - 309.8

- Adjustment reactions,unspecified - 309.9
- Prolonged Posttraumatic Stress Disorder - 309.81

**Alcohol-related disorders**

- Acute alcoholism - 303.00
- Alcohol abuse continuous - 305.01
- Alcohol abuse episodic - 305.02
- Alcohol abuse remission - 305.03
- Alcohol abuse, unspecified - 305.0
- Alcohol abuse, unspecified - 305.00
- Alcohol dependence unspecified drinking behavior - 303.90
- Alcohol dependence, other in remission - 303.93
- Alcohol dependence: continuous drinking - 303.91
- Alcohol dependence: episodic drinking - 303.92
- Alcohol induced mental disorders - 291
- Alcohol induced sleep disorders - 291.82
- Alcohol intoxication, idiosyncratic - 291.4
- Alcohol withdrawal - 291.81
- Alcohol withdrawal delirium - 291.0
- Alcohol, accidental poisoning - E860.0
- Alcohol, accidental poisoning. - E860
- Alcohol, acute intoxication - 303.0
- Alcohol, toxic effect of - 980
- Alcohol, toxic effect of - 980.0
- Alcohol-induced mental disorders, other specified - 291.8
- Alcohol-induced mental disorders, other specified - 291.89
- Alcohol-induced mental disorders, unspecified - 291.9
- Alcohol-induced persisting amnesic disorder - 291.1
- Alcohol-induced persisting dementia - 291.2
- Alcohol-induced psychotic disorder with delusions - 291.5
- Alcohol-induced psychotic disorder with hallucinations - 291.3
- Elevated blood alcohol - 790.3
- Gastritis due to alcohol - 535.30
- Hx of alcohol abuse - V11.3
- Other and unspecified alcohol dependence - 303.9

**Anxiety, dissociative and somatoform disorders**

- Acute reaction to stress - 308
- Acute reaction to stress, unspecified – 308.9
- Acute reactive stress - 308.3
- Agoraphobia with panic attacks - 300.21
- Anxiety disorder in conditions classified elsewhere - 293.84
- Anxiety NOS - 300.00
- Anxiety states - 300.0
- Anxiety, dissociative and somatoform disorders - 300
- Anxiety, other – 300.09
- Dissociative disorder or reaction unspecified - 300.15
- Gastrointestinal problems due to mental factors - 306.4
- Generalized anxiety disorder - 300.02
- Hypochondriasis, body dysmorphic disorder, - 300.7
- Identity disorder- 313.82
- Neurasthenia – 300.5
- Obsessive compulsive disorder - 300.3
- Obsessive-compulsive disorder - 300.39
- Panic disorder without agoraphobia - 300.01

- Phobia, isolated or specific - 300.29
- Phobia, unspecified - 300.20
- Predominant disturbance of emotions - 308.0
- Social phobia - 300.23
- Tourette's disorder - 307.23
- Unspecified nonpsychotic mental disorder - 300.9

**Bipolar & other psychotic disorders**

- Affective psychoses in partial remission - 296.35
- Bipolar disorder unspecified – 296.80
- Bipolar disorder, other - 296.89
- Bipolar I disorder, most recent episode (or current) depressed - 296.5
- Bipolar I disorder, most recent episode (or current) depressed in partial or unspecified remission - 296.55
- Bipolar I disorder, most recent episode (or current) depressed in remission - 296.56
- Bipolar I disorder, most recent episode (or current) depressed mild degree - 296.51
- Bipolar I disorder, most recent episode (or current) depressed moderate degree - 296.52
- Bipolar I disorder, most recent episode (or current) manic - 296.4
- Bipolar I disorder, most recent episode (or current) manic in partial or unspecified remission - 296.45
- Bipolar I disorder, most recent episode (or current) manic moderate degree - 296.42
- Bipolar I disorder, most recent episode (or current) manic severe degree specified as with psychotic behavior- 296.44
- Bipolar I disorder, most recent episode (or current) manic unspecified degree - 296.40
- Bipolar I disorder, most recent episode (or current) mixed moderate degree - 296.62
- Bipolar I disorder, most recent episode (or current) unspecified - 296.7
- Bipolar II disorder - 296.89
- Other and unspecified bipolar disorders - 296.8
- Other and unspecified episodic mood disorder - 296.9
- Recurrent psychosis in full remission - 296.36
- Schizoaffective - 295.7
- Schizo-affective type schizophrenia unspecified state - 295.70
- Unspecified psychosis - 298.9

**Depression**

- Depression, major, full remission - 296.26
- Depression, major, mild - 296.21
- Depression, major, moderate - 296.22
- Depression, major, partial remission - 296.25
- Depression, major, severe - 296.23
- Depression, not elsewhere classified - 311
- Depression, not elsewhere classified – 311
- Depression, recurrent, severe – 296.33
- Depression, recurrent, unspecified – 296.30
- Depression, unipolar, recurrent, severe - 296.33
- Depression, unipolar, recurrent, unspecified - 296.30
- Depressive disorder, major , recurrent episode - 296.3
- Depressive disorder, major , single episode - 296.2
- Major depressive affective disorder recurrent episode severe degree specified as with psychotic behavior - 296.34
- Major depressive disorder, recurrent mild - 296.31
- Major depressive disorder, recurrent moderate - 296.32
- Major depressive disorder, unspecified - 296.20
- Major recurrent depression - 296.39
- Mood disorder in conditions classified elsewhere - 293.83
- Mood disorder NOS - 296.90
- Neurotic depression - 300.4

- Suicide ideation - V62.84

**Eating disorders**

- Anorexia nervosa - 307.10
- Anorexia nervosa - 307.1
- Bulimia nervosa - 307.51
- Eating Disorder, other - 307.59
- Eating disorder, other and unspecified - 307.5
- Eating disorder, unspecified - 307.50

**Personality disorders**

- Borderline personality disorder – 301.83
- Cyclothymic personality disorder – 301.13
- Obsessive-compulsive personality disorder – 301.4
- Personality disorder, unspecified - 301.9

**Psychosocial stress**

- Adult sexual abuse - 995.83
- Child physical abuse - 995.54
- Child sexual abuse - 995.53
- Counsel physical/sexual abuse perpetrator - V62.83
- Educational circumstances - V62.3
- Gender identity disorder in adolescents or adults - 302.85
- Gender identity disorder in children - 302.6
- Gender identity disorder in children - 302.60
- Impotence NOS - 607.84
- Other occupational circumstances or maladjustment - V62.2
- Other psychological or physical stress not elsewhere classified - V62.89
- Other unspecified family circumstances - V61.8
- Psychosexual dysfunction female orgasm disorder - 302.73
- Psychosexual dysfunction premature ejaculation - 302.75
- Psychosexual dysfunction sexual excitement - 302.72
- Psychosexual dysfunction unspecified - 302.70
- Relational problem NOS - V62.81
- Social maladjustment - V62.4
- Uncomplicated bereavement - V62.82
- Unspecified counseling for marital & partner problems - V61.10
- Unspecified counseling for parent-child problems - V61.20

**METABOLIC/ENDOCRINE CATEGORY**

**Diabetes mellitus**

- Diabetes (non-insulin dependent) no complication - 250.00
- Diabetes II unspecified uncontrolled - 250.0
- Diabetes mellitus - 250
- Diabetes type I insulin dependent - 250.01

**Goiter**

- Goiter, specified as simple - 240.0
- Goiter, unspecified - 240.9

**Gout**

- Gout - 274
- Gout, unspecified - 274.9

**Metabolic disorders not grouped elsewhere**

- Hypothyroidism unspecified - 244.9
- Other and unspecified hyperlipidemia - 272.4
- Vitamin D deficiency NOS - 268.9

**Overweight, obesity & other hyperalimentation**



- Obesity, morbid - 278.01
- Obesity, unspecified - 278.00
- Overweight - 278.02
- Overweight and obesity - 278.0
- Overweight, obesity & other hyperalimentation – 278

## MUSCULOSKELETAL CATEGORY

### **Back & other unspecified musculoskeletal symptoms**

- Back disorders, other unspecified - 724.9
- Back symptoms, other - 724.8
- Backache, unspecified - 724.5
- Coccyx disorder unspecified - 724.70
- Coccyx disorder, other - 724.79
- Coccyx disorders - 724.7
- Coccyx hypermobility - 724.71
- Disorders of back, other and unspecified - 724
- Head & neck symptoms - 784
- Lumbago - 724.2
- Muscle spasm - 728.85
- Musculoskeletal pain - 729.1
- Neck pain - 723.1
- Pain in thoracic spine - 724.1
- Sacrum disorders - 724.6
- Sciatica - 724.3
- Spinal stenosis, lumbar region - 724.02
- Spinal stenosis, other - 724.09
- Spinal stenosis, other than cervical - 724.0
- Spinal stenosis, thoracic region - 724.01
- Spinal stenosis, unspecified region - 724.00
- Symptoms involving head and neck – 784
- Thoracic or lumbosacral neuritis or radiculitis, unspecified - 724.4

### **Joint pain**

- Chondromalacia of patella - 717.7
- Joint pain ankle & foot - 719.47
- Joint pain forearm - 719.43
- Joint pain pelvis - 719.45
- Joint pain, shoulder - 719.41
- Knee pain - 719.46
- Pain in joint, other specified sites - 719.48
- Pain in joint, upper arm - 719.42
- Pain limb - 729.5
- Patellar tendinitis - 726.64
- Temporomandibular joint disorders unspecified - 524.60
- Unspecified disorder of lower leg joint - 719.96
- Unspecified disorder of muscle, ligament, and fascia - 728.9

### **Bursitis**

- Achilles bursitis or tendinitis - 726.71
- Bursitis NOS - 727.3
- Ganglion cyst, other disorders of synovium, tendon, and bursa, ganglion, unspecified - 727.43

## NEUROLOGIC CATEGORY

### **Mononeuritis, upper limb & multiplex; carpal tunnel**

- Carpal tunnel syndrome - 354.0

- Mononeuritis of upper limb and mononeuritis multiplex - 354

**Neurological disorders**

- Headache - 784.0
- Migraine - 346.9
- Migraine, unspecified without intractable migraine - 346.90
- Multiple sclerosis – 340
- Postconcussion syndrome - 310.2
- Tension headache - 307.81

**Seizures**

- Convulsions excluding epileptic (seizure disorder) - 780.3
- Convulsions, febrile, complex - 780.32
- Convulsions, febrile, simple, unspecified - 780.31
- Convulsions, other - 780.39

**NON-SPECIFIC CATEGORY**

**Abnormal findings in other body substances**

- Abnormal findings in body substances, other nonspecific (vaginal fluids) - 792.9
- Abnormal findings in other body substances, nonspecific - 792
- Cerebrospinal fluid, abnormal findings - 792.0
- Non-specific positive blood test - 790.99
- Other & NOS abnormal test findings – 795
- Other abnormal blood chemistry – 790.6
- Saliva, abnormal findings - 792.4
- Semen, abnormal findings - 792.2
- Stool content, abnormal findings - 792.1

**Administrative**

- Administrative encounter, unspecified - V68.9
- Issue of med certificates - V68.0
- Medical certificates, other issues - V68.09

**Counseling or consultation**

- Counseling NOS - V65.40
- Counseling on other STDs - V65.45
- Counseling, other specified - V65.49
- Dietary surveillance & counseling - V65.3
- Health counseling - V65.9
- HIV counseling - V65.44
- HIV counseling, pre or post test - V65.44
- No diagnosis or condition On Axis I - V71.09
- Observation & evaluation for other condition not found - V71.89
- Other reason for consult - V65.8

**Exposure blood or body fluid**

- Exposure, body fluids, potentially hazardous - V15.85

**Follow-up care**

- Antibody response examination - V72.61
- Convalescence, other - V66.5
- Exam, unspecified - V72.9
- Follow up exam unspecified - V67.9
- Follow up examination - V67.59
- Post surgical, other - V45.89
- Prescriptions refill - V68.1

**General symptoms**

- Abnormal weight gain - 783.1
- Chronic fatigue syndrome - 780.71

- Complaint With no diagnosis - V65.5
- Dehydration - 276.51
- Diagnosis deferred - 799.9
- Fever - 780.6
- Fever, unspecified - 780.60
- Functional quadriplegia (complete immobility due to severe physical disability or frailty) - 780.72
- General symptoms - 780
- Lab exam, unspecified - V72.60
- Loss of weight - 783.21
- Malaise and fatigue - 780.7
- Malaise, fatigue, other - 780.79
- Underweight - 783.22

#### **PREVENTIVE CATEGORY**

##### **Allergy shots & prophylactic treatments except vaccines**

- Allergy shot - V07.1
- Other prophylactic measure - V07.8
- Prophylactic immunotherapy - V07.2

##### **Contraceptive management**

- Contraceptive management NOS - V25.9
- Counseling on other contraceptive measures - V25.02
- Family planning natural to avoid pregnancy - V25.04
- History, contraceptive management - V15.7
- Implantable subdermal-checking, reinsertion or removal - V25.43
- Implantable subdermal-in situ - V45.52
- Implantable subdermal-insertion - V25.5
- IUD checking - V25.42
- IUD in situ - V45.51
- IUD insertion - V25.11
- IUD reinsertion - V25.13
- IUD removal - V25.12
- Menstrual regulation - V25.3
- Oral repeat prescription - V25.41
- Other specified contraceptive device in situ - V45.59
- Other specified contraceptive method - V25.8
- Postcoital emergency prescription or use - V25.03
- Prescription or use of oral contraceptives - V25.01
- Rx for oral contraceptives - V25.01
- Sterilization - V25.2
- Surveillance - V25.40
- Surveillance of other contraceptive method - V25.49
- Tuboplasty or vasectomy proposed - V25.09

##### **Screenings (excluding for STIs)**

- Exam of eyes and vision - V72.0
- Screening for alcoholism - V79.1
- Screening for depression - V79.0
- Screening for hypertension - V81.1
- Screening for infectious diseases - V75.9
- Screening for other specified viral diseases - V73.89
- Screening for pulmonary TB - V74.1
- Screening for unspecified viral diseases - V73.99
- Special screening for other and unspecified endocrine nutritional metabolic and immunity disorders - V77.91

**Pap smear**

- Pap smear (routine) of cervix and vagina with gyn exam - V72.31
- Pap smear cervix routine without gyn exam - V76.2
- Pap smear cervix to confirm recent normal smear following initial abnormal smear - V72.32

**Pregnancy tests**

- Pregnancy examination or test, pregnancy unconfirmed - V72.41
- Pregnancy examination or test - V72.4
- Pregnancy examination or test confirmed - V72.42
- Pregnancy examination or test, pregnancy unconfirmed - V72.40

**Routine & required physicals**

- Animal research clearance - V70.5
- Routine physical exam general medical - V70.0
- Sports physical - V70.3

**STI related screenings**

- Contact w/ or exposure to venereal disease - V01.6
- HIV, exposure to - V01.79
- HIV, nonspecific serologic evidence of - 795.71
- Screen for Human Papillomavirus (HPV) - V73.81
- Screening for other specified chlamydial disease - V73.88
- Screening for other specified viral and chlamydial diseases - V73.8
- Screening for unspecified chlamydial disease - V73.98
- Screening for unspecified viral and chlamydial diseases - V73.9
- Screening for venereal disease, gonorrhea and spirochetal infection - V74.5

**Vaccines**

- Flu vaccination - V04.81
- Gardasil - V04.89
- Hepatitis immunization - V05.3
- Immunization MMR - V06.4
- Immunization typhoid - V03.1
- Meningococcal vaccine - V03.89
- Need for prophylactic vaccination and inoculation against varicella - V05.4
- Polio Vaccine - V04.0
- Tdap immunization - V06.1
- Vaccine For disease - V05.8
- Vaccine for rabies - V04.5
- Vaccine for unspecified single disease - V05.9
- Vaccine for yellow fever - V04.4

**REHABILITATION**

- Care involving use of rehabilitation procedures - V57
- Other physical therapy - V57.1
- Other specified rehab procedure - V57.89

**RESPIRATORY CATEGORY**

**Acute upper respiratory infections**

- Acute frontal sinusitis - 461.1
- Acute maxillary sinusitis - 461.0
- Acute nasopharyngitis - 460
- Acute pharyngitis - 462.
- Acute sinusitis - 461
- Chronic rhinitis - 472.0
- Laryngopharyngitis, Acute - 465.0
- Other acute sinusitis - 461.8

- Other disease of nasal cavity & sinuses - 478.19
- Peritonsillar abscess - 475
- Pharyngitis, acute - 462
- Post Nasal drip - 784.91
- Sinusitis unspecified chronic - 473.9
- Sinusitis, acute - 461.9
- Throat pain - 784.1
- Tonsillitis, acute - 463
- Upper respiratory infection other multiple site - 465.8
- Upper respiratory infection, unspecified site, acute (URI NOS) - 465.9
- Upper respiratory infections of multiple or unspecified sites, acute – 465

**Asthma**

- Asthma - 493
- Asthma extrinsic - 493.0
- Asthma intrinsic - 493.1
- Asthma unspecified - 493.90
- Asthma, chronic obstructive - 493.2
- Asthma, cough variant - 493.82
- Asthma, unspecified - 493.9
- Asthma, unspecified type, with (acute) exacerbation - 493.92
- Bronchospasm, exercise induced - 493.81
- Bronchospasm, acute - 519.11

**Bronchitis**

- Acute bronchitis - 466.0
- Acute bronchitis/bronchiolitis – 466
- Bronchitis NOS - 490
- Simple chronic bronchitis - 491.0

**Cough**

- Cough - 786.2
- Cough or hiccough, psychogenic - 306.1
- Cough, with hemorrhage (hemoptysis) 786.3
- Primary cough headache - 339.83

**Respiratory system and other chest symptoms**

- Abnormal chest sounds - 786.7
- Apnea (excludes sleep apnea) - 786.03
- Chest pain - 786.5
- Chest pain, unspecified - 786.50
- Cheyne-Stokes respiration - 786.04
- Dyspnea and respiratory abnormalities - 786.0
- Dyspnea and respiratory abnormalities, other - 786.09
- Hiccough - 786.8
- Hyperventilation - 786.01
- Orthopnea - 786.02
- Other respiratory system diseases NOS - 519.8
- Pneumonia and influenza, other specified organism - 483.8
- Pneumonia organism unspecified - 486
- Precordial pain - 786.51
- Respiration painful - 786.52
- Respiratory abnormality, unspecified - 786.00
- Respiratory and other chest symptoms, other (chest discomfort, pressure, tightness or other symptom) - 786.59
- respiratory system and chest symptoms, other (breath-holding spell) - 786.9
- Shortness of breath - 786.05

- Sputum, abnormal - 786.4
- Stridor - 786.1
- Swelling, mass or lump in chest (excludes breast lump) - 786.6
- Tachypnea - 786.06
- Tietzes disease (costochondritis) - 733.6
- Wheezing (excludes asthma) - 786.07

## **SKIN, NAILS & HAIR CATEGORY**

### **Contact dermatitis and other eczema**

- Contact dermatitis and other eczema due to cosmetics - 692.81
- Contact dermatitis and other eczema due to detergents - 692.0
- Contact dermatitis and other eczema due to oils and greases - 692.1
- Contact dermatitis and other eczema due to solvents - 692.2
- Contact dermatitis and other eczema, due to animal (cat) (dog) dander - 692.84
- Contact dermatitis and other eczema, due to drugs and medicines in contact with skin - 692.3
- Contact dermatitis and other eczema, due to other chemical products - 692.4
- Contact dermatitis and other eczema, due to other radiation (excludes solar radiation) - 692.82
- Contact dermatitis and other eczema, due to other specified agents - 692.8
- Contact dermatitis and other eczema, due to plants (except food) - 692.6
- Contact dermatitis and other eczema, other (excludes allergy NOS) - 692.89
- Contact dermatitis and other eczema, unspecified cause - 692.9
- Seborrheic dermatitis, unspecified - 690.10
- Sunburn - 692.71
- Unspecified dermatitis due to sun - 692.70

### **Disease of nail**

- Dermatophytosis of nail - 110.1
- Ingrowing nail - 703.0
- Nail, diseases of - 703
- Nail, other specified diseases of - 703.8
- Nail, uUnspecified disease of - 703.9

### **Hair and hair follicles**

- Alopecia - 704.0
- Alopecia areata - 704.01
- Alopecia, other - 704.09
- Alopecia, telogen effluvium - 704.02
- Alopecia, unspecified - 704.00
- Folliculitis - 704.8
- Hair and hair follicles, diseases – 704

### **Skin Infections**

- Cellulitis - 682.9
- Cellulitis and abscess of leg, except foot - 682.6
- Cellulitis and abscess of unspecified digit - 681.9
- Cellulitis and abscess of upper arm and forearm - 682.3
- Dermatophytosis, body - 110.5
- Dermatophytosis of foot – 110.4
- Dermatophytosis of groin and perianal area – 110.3

### **Skin disorders, not grouped elsewhere**

- Acariasis - 133
- Acne NOS - 706.1
- Disturbance of skin sensation - 782.0
- Local infection of skin & subcu tissue NOS - 686.9
- Localized superficial swelling, mass, or lump - 782.2
- Molluscum contagiosum - 078.0

- Nevi/nevus not vulvar - 216.9
- Other atopic dermatitis and related conditions - 691.8
- Pilonidal cyst without abscess - 685.1
- Pityriasis rosea - 696.3
- Pityriasis versicolor - 111.0
- Plantar fascial fibromatosis - 728.71
- Plantar wart - 078.12
- Rash & skin eruption NOS - 782.1
- Scabies - 133.0
- Sebaceous Cyst - 706.2
- Skin disorder unspecified - 709.9
- Sty eyelid - 373.11
- Unspecified keratitis - 370.9

#### **SLEEP DISORDERS CATEGORY**

- Circadian rhythm sleep disorder of nonorganic - 307.45
- Hypersomnia due to medical condition classified elsewhere - 327.14
- Hypersomnia with sleep apnea, unspecified - 780.53
- Hypersomnia, unspecified - 780.54
- Insomnia due to mental disorder - 327.02
- Insomnia with sleep apnea, unspecified - 780.51
- Insomnia, unspecified - 780.52
- Nonorganic sleep disorder unspecified - 307.40
- Other dysfunctions of sleep stages or arousal from sleep - 307.47
- Primary insomnia - 307.42
- Sleep apnea, unspecified - 780.57
- Sleep disturbance, other - 780.59
- Sleep disturbance, unspecified - 780.50
- Sleep disturbances - 780.5
- Sleep related movement disorder, unspecified - 780.58
- Transient disorder of initiating or maintaining sleep - 307.41

#### **STI CATEGORY**

##### **Chlamydia infection**

- Chlamydia - 099.41
- Venereal disease due to chlamydia, Other - 099.5

##### **Gonococcal infections**

- Gonococcal infections - 098
- Gonococcal infections acute, lower genitourinary tract - 098.0

##### **Herpes simplex genital**

- Herpes simplex, genital - 054.1
- Herpes simplex, genital, unspecified - 054.10
- Herpes, genital other - 054.19
- Herpetic infection of penis - 054.13
- Herpetic ulceration of vulva - 054.12
- Herpetic vulvovaginitis - 054.11

##### **HPV**

- HPV + test high risk anal - 796.75
- HPV + test high risk cervical - 795.05
- HPV + test high risk vaginal - 795.15
- HPV + test low risk anal - 796.79
- HPV + test low risk cervical - 795.09
- HPV + test low risk vaginal - 795.19

- Human papillomavirus - 079.4
  - Human papillomavirus (HPV) - 79.4
  - Pap smear (ASC-H) cervix atypical squamous cells cannot exclude high grade squamous intraepithelial lesion - 795.02
  - Pap smear (ASC-US) cervix atypical squamous cells of undetermined significance - 795.01
  - Pap smear (HGSIL) anus high grade squamous intraepithelial lesion - 796.74
  - Pap smear (HGSIL) cervix high grade squamous intraepithelial lesion - 795.04
  - Pap smear (HGSIL) vagina high grade squamous intraepithelial lesion - 795.14
  - Pap smear (LGSIL) anus low grade squamous intraepithelial lesion - 796.73
  - Pap smear (LGSIL) cervix low grade squamous intraepithelial lesion. - 795.03
  - Pap smear (LGSIL) vagina low grade squamous intraepithelial lesion - 795.13
  - Pap smear CIN I - 622.11
  - Pap smear CIN II - 622.12
  - Pap smear CIN III - 233.1
  - Viral warts - 78.1
  - Warts (external genital) condyloma accuminata - 78.11
  - Warts (external genital) condyloma acuminatum - 078.11
  - Warts other specified viral - 78.19
  - Warts, other specified viral warts - 078.19
- Human immunodeficiency virus**
- AIDS - 042
  - HIV positive status (asymptomatic) - V08
- Venereal diseases not grouped elsewhere**
- Candidiasis vulva & vagina - 112.1
  - Venereal diseases, other – 099

## URINARY CATEGORY

### Cystitis

- Cystitis - 595
- Cystitis cystica - 595.81
- Cystitis in diseases classified elsewhere - 595.4
- Cystitis, acute (UTI) - 595.0
- Cystitis, chronic interstitial - 595.1
- Cystitis, irradiation - 595.82
- Cystitis, other - 595.89
- Cystitis, other chronic - 595.2
- Cystitis, other specified types - 595.8
- Cystitis, unspecified - 595.9
- Trigonitis - 595.3

### Urethritis

- Nongonococcal urethritis, other - 099.4
- Urethral abscess - 597.0
- Urethral syndrome NOS - 597.81
- Urethritis, not sexually transmitted and urethral syndrome - 597
- Urethritis, other - 597.8
- Urethritis, other - 597.89
- Urethritis, unspecified - 597.80

### Urinary system symptoms

- Dysuria - 788.1
- Enuresis - 307.6
- Incomplete bladder emptying - 788.21
- Incontinence, stress, female - 625.6
- Nocturia - 788.43



- Nocturnal enuresis - 788.36
- Oliguria and anuria - 788.5
- Other disorder of urethra/urinary tract - 599
- Polyuria - 788.42
- Post-void dribbling - 788.35
- Renal colic - 788.0
- Urethral discharge - 788.7
- Urinary frequency - 788.41
- Urinary hesitancy - 788.64
- Urinary incontinence - 788.3
- Urinary incontinence urge - 788.31
- Urinary incontinence without sensory awareness - 788.34
- Urinary incontinence, functional - 788.91
- Urinary incontinence, other - 788.39
- Urinary incontinence, unspecified - 788.30
- Urinary mixed incontinence (urge and stress both male and female) - 788.33
- Urinary stream, splitting of - 788.61
- Urinary stress incontinence, male - 788.32
- Urinary system symptoms - 788
- Urinary system, other symptoms - 788.99
- Urinary system, other symptoms involving - 788.9
- Urination abnormality, other - 788.6
- Urination frequency and polyuria - 788.4
- Urination system symptoms, other - 788.69
- Urination urgency - 788.63
- Urination, straining on - 788.65
- Urine retention - 788.2
- Urine retention unspecified - 788.20
- Urine retention, other specified - 788.29
- Urine, extravasation of - 788.8

**Urinary tract infection**

- Hematuria - 599.7
- Hematuria, gross - 599.71
- Hematuria, mMicroscopic - 599.72
- Hematuria, unspecified - 599.70
- Urinary tract infection, site not specified - 599.0
